# Supplementary figures and images for: A CD8αβ co-receptor modified to contain an intracellular CD28 signaling tail enhances TCR-engineered T cell function independent of solid-tumor-associated co-stimulatory ligands
Source: Research Square preprint supplement (doi:10.21203/rs.3.rs-5939098/v1), 2025-04-21

Extended Data Figure 9

A. Surface staining gating strategy

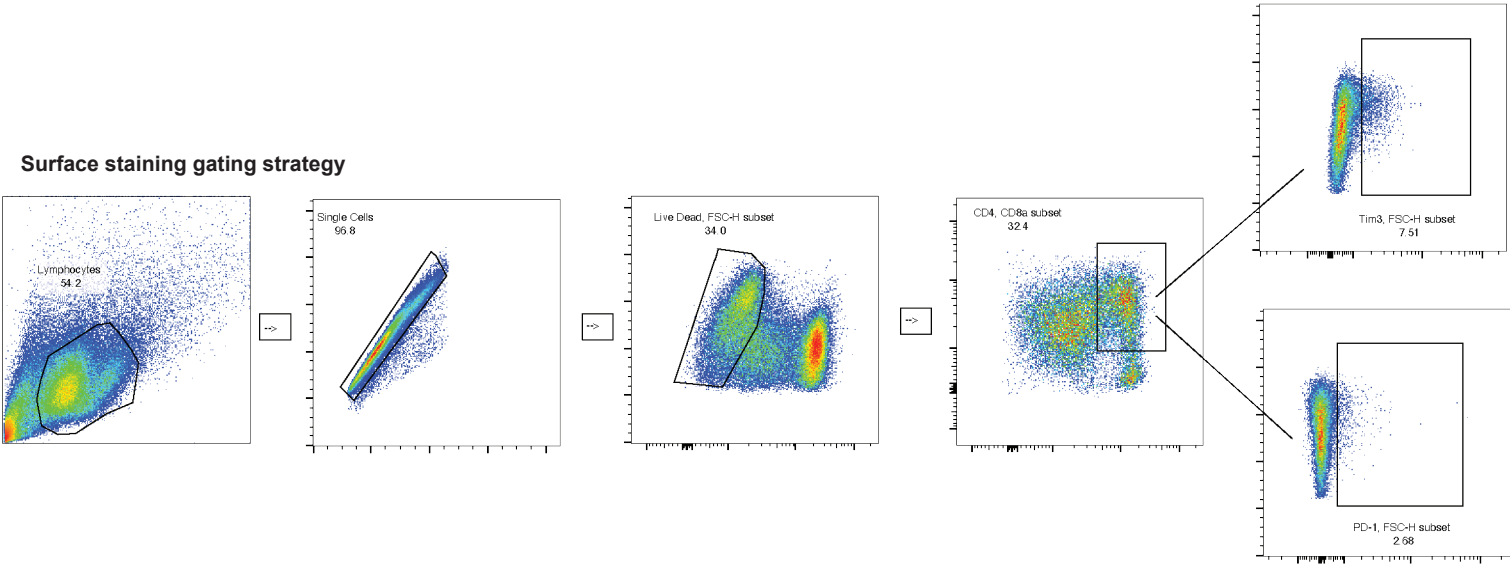

B. ICS staining gating strategy

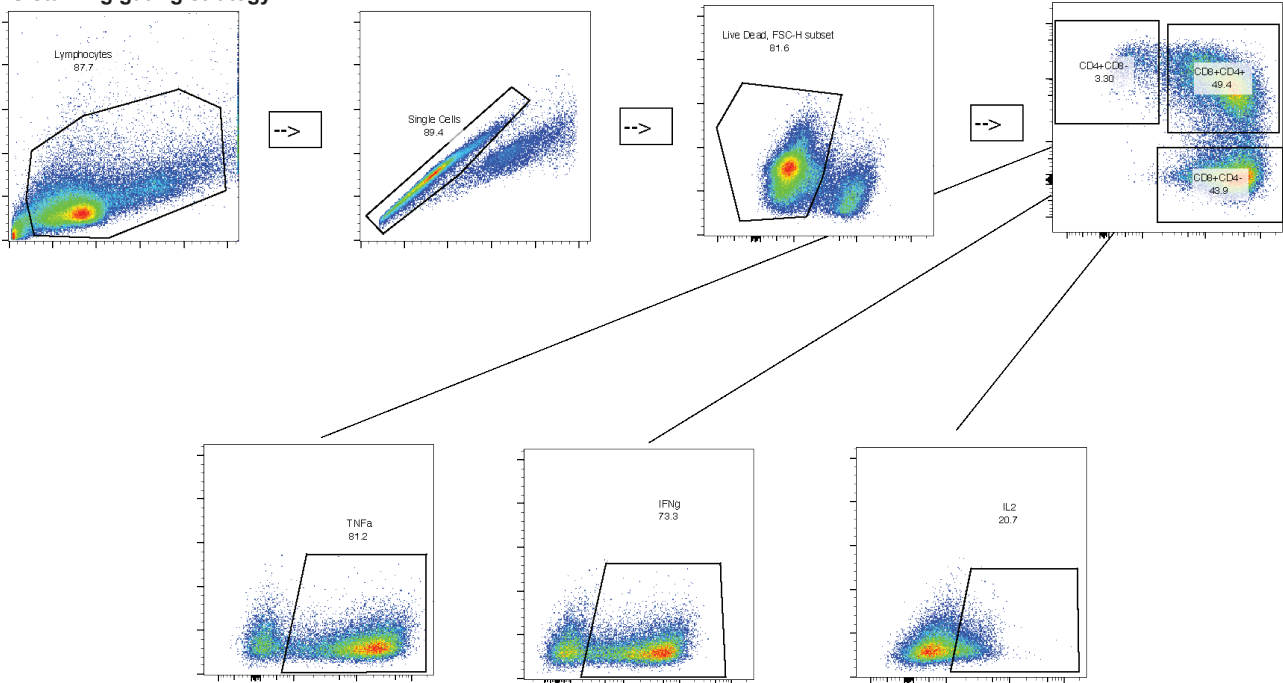

Supplement: Supplementary file 1 [file 36d1a205d4d5cf0213ebf974.pdf]
